# Supplementary material for: Constructing g-C3N4/Cd1−xZnxS-Based Heterostructures for Efficient Hydrogen Production under Visible Light
Source: MDPI journal article supplement (doi:10.3390/catal11111340), 2021-11-06
Supplement: s1 [file s1]

## SUPPORTING INFORMATION

**Table S1. EDX data of the photocatalyst 20Cd0.8/Pt/CN; domain with predominated g-C<sub>3</sub>N<sub>4</sub> content.**

| Element   | Family   | Atomic Fraction (%) | Atomic Error (%) | Mass Fraction (%) | Mass Error (%) |
|-----------|----------|---------------------|------------------|-------------------|----------------|
| C         | K        | 93.1                | 3.7              | 67.2              | 1.9            |
| S         | K        | 2.8                 | 0.5              | 5.3               | 1.0            |
| Zn        | K        | 0.8                 | 0.1              | 31                | 0.4            |
| Cd        | L        | 1.2                 | 0.2              | 8.4               | 1.0            |
| <b>Pt</b> | <b>L</b> | <b>1.3</b>          | <b>0.2</b>       | <b>14.8</b>       | <b>1.7</b>     |

**Table S2. EDX data of the photocatalyst 20Cd0.8/Pt/CN; domain with predominated g-C<sub>3</sub>N<sub>4</sub> content.**

| Element   | Family   | Atomic Fraction (%) | Atomic Error (%) | Mass Fraction (%) | Mass Error (%) |
|-----------|----------|---------------------|------------------|-------------------|----------------|
| C         | K        | 91.9                | 3.6              | 61.9              | 1.7            |
| S         | K        | 3.3                 | 0.6              | 6.0               | 1.1            |
| Zn        | K        | 0.8                 | 0.1              | 2.8               | 0.4            |
| Cd        | L        | 1.6                 | 0.2              | 9.8               | 1.2            |
| <b>Pt</b> | <b>L</b> | <b>1.7</b>          | <b>0.2</b>       | <b>18.4</b>       | <b>2.1</b>     |

**Table S3. EDX data of the photocatalyst 20Cd0.8/Pt/CN; domain with g-C<sub>3</sub>N<sub>4</sub> and Cd<sub>0.8</sub>Zn<sub>0.2</sub>S.**

| Element   | Family   | Atomic Fraction (%) | Atomic Error (%) | Mass Fraction (%) | Mass Error (%) |
|-----------|----------|---------------------|------------------|-------------------|----------------|
| C         | K        | 55.8                | 6.4              | 19.5              | 1.4            |
| S         | K        | 23.8                | 5.2              | 22.2              | 4.4            |
| Zn        | K        | 3.1                 | 0.5              | 5.8               | 0.9            |
| Cd        | L        | 15.8                | 2.6              | 51.4              | 7.0            |
| <b>Pt</b> | <b>L</b> | <b>0.01</b>         | <b>0.00</b>      | <b>0.03</b>       | <b>0.01</b>    |

**Table S4. EDX data of the photocatalyst 20Cd0.8/Pt/CN; domain with g-C<sub>3</sub>N<sub>4</sub> and Cd<sub>0.8</sub>Zn<sub>0.2</sub>S.**

| Element   | Family   | Atomic Fraction (%) | Atomic Error (%) | Mass Fraction (%) | Mass Error (%) |
|-----------|----------|---------------------|------------------|-------------------|----------------|
| C         | K        | 65.0                | 5.7              | 27.5              | 1.6            |
| S         | K        | 16.1                | 3.3              | 18.2              | 3.6            |
| Zn        | K        | 6.2                 | 1.0              | 14.3              | 2.1            |
| Cd        | L        | 9.1                 | 1.3              | 35.9              | 4.6            |
| <b>Pt</b> | <b>L</b> | <b>0.2</b>          | <b>0.03</b>      | <b>1.4</b>        | <b>0.2</b>     |
